# Supplementary material
Source: HighWire-hosted journal article supplement (https://ejhp.bmj.com/content/26/4/187)
Supplement: inline-supplementary-material-4 [file inline-supplementary-material-4.docx]

## Appendix 4. Result of quality assessment.

AMSTAR 2 score

| SR  →  Amstar # ↓ | Al-aqeel, Gershuniet al. 2017 | Mathes, Antoine et al. 2014 | Ngwatu, Nsengiyumva et al. 2018 | Nieuwlaat, Wilczynski et al. 2014 | Normansell, Kew et al. 2017 | Weeks, George et al. 2016 | Zaugg, Korb-Savoldelli et. al 2018 | Zhong, Ni et al. 2014 |
| --- | --- | --- | --- | --- | --- | --- | --- | --- |
| # 1 | Y | Y | Y | Y | Y | Y | Y | Y |
| # 2 | Y | N | N | N | Y | Y | Y | N |
| # 3 | N | N | N | N | N | N | Y | N |
| # 4 | Y | PY | PY | Y | Y | Y | Y | PY |
| # 5 | Y | Y | Y | Y | Y | Y | Y | Y |
| # 6 | Y | Y | Y | Y | Y | Y | Y | Y |
| # 7 | Y | N | Y | Y | Y | Y | Y | N |
| # 8 | Y | PY | PY | Y | Y | Y | Y | PY |
| # 9 | Y | PY | Y | Y | Y | Y | Y | PY |
| # 10 | Y | N | N | N | Y | Y | Y | N |
| # 11 | NA | Y | NA | NA | Y | Y | NA | Y |
| # 12 | NA | Y | NA | NA | Y | Y | NA | Y |
| # 13 | Y | Y | Y | Y | Y | Y | Y | Y |
| # 14 | Y | Y | Y | Y | Y | Y | Y | Y |
| # 15 | NA | Y | NA | NA | Y | Y | NA | N |
| # 16 | Y | Y | Y | Y | Y | Y | Y | Y |
| Total score | 12 | 10,5 | 9 | 10 | 15 | 15 | 13 | 9,5 |

NA = Not applicable

PRISMA score (individual and consensus)

| SR  →  PRISMA  # ↓ | Al-aqeel et al 2017 | Mathes et al 2014 | Ngwatu et al 2018 | Nieuwlaat et al 2014 | Normansell et al 2017 | Weeks et al 2016 | Zaugg et al 2018 | Zhong et al 2014 |
| --- | --- | --- | --- | --- | --- | --- | --- | --- |
| 1 | 1 | 1 | 1 | 1 | ÷ | ÷ | 1 | 1 |
| 2 | 1 | 1 | 1 | 1 | 1 | 1 | 1 | 1 |
| 3 | 1 | 1 | 1 | 1 | 1 | 1 | 1 | 1 |
| 4 | 1 | 1 | 1 | 1 | 1 | 1 | 1 | 1 |
| 5 | ÷ | ÷ | ÷ | ÷ | 1 | ÷ | ÷ | ÷ |
| 6 | 1 | 1 | 1 | 1 | 1 | 1 | 1 | 1 |
| 7 | 1 | 1 | 1 | 1 | 1 | 1 | 1 | 1 |
| 8 | 1 | 1 | 1 | 1 | 1 | 1 | 1 | ÷ |
| 9 | 1 | 1 | 1 | 1 | 1 | 1 | 1 | 1 |
| 10 | 1 | 1 | 1 | 1 | 1 | 1 | 1 | 1 |
| 11 | 1 | 1 | 1 | 1 | 1 | 1 | 1 | 1 |
| 12 | 1 | 1 | 1 | 1 | 1 | 1 | 1 | 1 |
| 13 | 1 | 1 | ÷ | 1 | 1 | 1 | 1 | 1 |
| 14 | 1 | 1 | ÷ | ÷ | 1 | 1 | ÷ | 1 |
| 15 | 1 | ÷ | 1 | 1 | 1 | 1 | 1 | ÷ |
| 16 | 1 | ÷ | ÷ | ÷ | 1 | 1 | ÷ | 1 |
| 17 | 1 | 1 | 1 | 1 | 1 | 1 | 1 | 1 |
| 18 | 1 | 1 | 1 | 1 | 1 | 1 | 1 | 1 |
| 19 | 1 | 1 | 1 | 1 | 1 | 1 | 1 | 1 |
| 20 | 1 | 1 | 1 | 1 | 1 | 1 | 1 | 1 |
| 21 | ÷ | 1 | ÷ | ÷ | 1 | 1 | ÷ | 1 |
| 22 | 1 | ÷ | 1 | ÷ | 1 | 1 | 1 | ÷ |
| 23 | ÷ | ÷ | ÷ | ÷ | 1 | 1 | ÷ | 1 |
| 24 | 1 | 1 | 1 | 1 | 1 | 1 | 1 | 1 |
| 25 | 1 | 1 | 1 | 1 | 1 | 1 | 1 | 1 |
| 26 | 1 | 1 | 1 | 1 | 1 | 1 | 1 | 1 |
| 27 | 1 | ÷ | 1 | 1 | 1 | 1 | 1 | 1 |
| Total reviewer 1 | 23 | 20 | 19 | 22 | 26 | 25 | 23 | 23 |
| Total  reviewer 2 | 20 | 21 | 16 | 18 | 24 | 24 | 17 | 20 |
| Total con-sensus | 24 | 21 | 21 | 21 | 26 | 25 | 22 | 23 |
